# Supplementary material for: Three-year risk of cardiovascular disease among intensive care patients with acute kidney injury: a population-based cohort study
Source: PubMed Central journal article supplement (PMC4197334; doi:10.1186/s13054-014-0492-2), 2014-10-14
Supplement: 13054_2014_492_MOESM1_ESM.pdf [file 13054_2014_492_MOESM1_ESM.pdf]

## Relevant codes used in the current study

| Description                                                      | Codes                                                                                                                                                                                                                                                                                                            |
|------------------------------------------------------------------|------------------------------------------------------------------------------------------------------------------------------------------------------------------------------------------------------------------------------------------------------------------------------------------------------------------|
| <b>Diseases (ICD-10)</b>                                         |                                                                                                                                                                                                                                                                                                                  |
| Myocardial infarction                                            | I21                                                                                                                                                                                                                                                                                                              |
| Stroke                                                           | I61,I63, I64                                                                                                                                                                                                                                                                                                     |
| Heart failure                                                    | I50, I11.0, I13.0, I13.2                                                                                                                                                                                                                                                                                         |
| Ischemic heart disease (except MI)                               | I20-I25 (except I21)                                                                                                                                                                                                                                                                                             |
| Cerebrovascular disease (except stroke)                          | I60-I69 (except I63-I64)                                                                                                                                                                                                                                                                                         |
| Diabetes                                                         | E10E14, O24 (except O24.4), G63.2, H36.0, N08.3                                                                                                                                                                                                                                                                  |
| Peripheral vascular disease                                      | I70, I71, I72, I73, I74, I77                                                                                                                                                                                                                                                                                     |
| Hypertension                                                     | I10-I15                                                                                                                                                                                                                                                                                                          |
| Cancer                                                           | C00-C96                                                                                                                                                                                                                                                                                                          |
| <b>Primary diagnosis during current hospitalization (ICD-10)</b> |                                                                                                                                                                                                                                                                                                                  |
| Infectious diseases                                              | A00-B99, G00-G07, I00-I02, I30.1, I32.0, I33, I38, I40.0, J00-J06, J36, J39.0, J10-J22, J85.1, J86, K35, K37, K57.0, K57.2, K57.4, K57.8, K61, K63.0, K65.0, K65.9, K67, K75.0, K75.1, K80.0, K80.3, K80.4, K81.0, K81.9, K83.0, L00-L03, L05-L08, M00, M01, M86, N10, N12, N15.1, N30, N39.0, N41, N45, N70-N77 |
| Cancer                                                           | C00-D89                                                                                                                                                                                                                                                                                                          |
| Endocrine diseases                                               | E00-E90                                                                                                                                                                                                                                                                                                          |
| Cardiovascular diseases                                          | I00-I99 without I00-I02, I30.1, I32.0, I33, I38, I40.0                                                                                                                                                                                                                                                           |
| Respiratory diseases                                             | J00-J99 without J00-J06, J10-J22, , J36, J39.0, J85.1, J86                                                                                                                                                                                                                                                       |
| Gastrointestinal or liver diseases                               | K00-K99 without K35, K37, K57.0, K57.2, K57.4, K57.8, K61, K63.0, K65.0, K65.9, K67, K75.0, K75.1, K80.0, K80.3, K80.4, K81.0, K81.9, K83.0.                                                                                                                                                                     |
| Trauma or poisoning                                              | S00-S99, T00-T97                                                                                                                                                                                                                                                                                                 |
| Other                                                            | All codes not included in other categories                                                                                                                                                                                                                                                                       |
| <b>Treatments (Procedure codes)</b>                              |                                                                                                                                                                                                                                                                                                                  |
| Intensive therapy                                                | NABE, NABB                                                                                                                                                                                                                                                                                                       |
| Acute dialysis                                                   | BJFDO                                                                                                                                                                                                                                                                                                            |
| Mechanical ventilation                                           | BGDA0                                                                                                                                                                                                                                                                                                            |
| Treatment with inotropes or vasopressors                         | BFHC92, BFHC93, BFHC95                                                                                                                                                                                                                                                                                           |
| <b>Laboratory data (NPU- and local laboratory codes)</b>         |                                                                                                                                                                                                                                                                                                                  |
| Plasma Creatinine                                                | NPU18016, NPU01807, NPU04998. ASS00356, ASS00354, ASS00355                                                                                                                                                                                                                                                       |
| Hemoglobin A1c                                                   | NPU03835, NPU02307, NPU27300, DNK35249, AAB00092, AAB00091, AAA00740, AAB00061                                                                                                                                                                                                                                   |
| <b>Drugs (ATC-codes)</b>                                         |                                                                                                                                                                                                                                                                                                                  |
| Diuretics                                                        | C03                                                                                                                                                                                                                                                                                                              |
| Beta blockers                                                    | C07                                                                                                                                                                                                                                                                                                              |
| Calcium channel antagonists                                      | C08                                                                                                                                                                                                                                                                                                              |
| ACE inhibitors/AT2 antagonist                                    | C09A, C09BA, C09BB, C09CA, C09DA, C09DB                                                                                                                                                                                                                                                                          |
| Acetylsalicylic acid                                             | B01AC06;                                                                                                                                                                                                                                                                                                         |
| Nitrates                                                         | C01DA                                                                                                                                                                                                                                                                                                            |
| Statins                                                          | C10AA                                                                                                                                                                                                                                                                                                            |
| NSAIDS                                                           | M01A                                                                                                                                                                                                                                                                                                             |
| <b>Surgical procedures (NCSP codes)</b>                          |                                                                                                                                                                                                                                                                                                                  |
| Cardiac surgery                                                  | KF                                                                                                                                                                                                                                                                                                               |
| Non-cardiac surgery                                              | All codes include in other categories                                                                                                                                                                                                                                                                            |

ACE, angiotensin converting enzyme; ATC, Anatomical Therapeutic Chemical; AT2, angiotensin 2; ICD-10, International Classification of Diseases, 10<sup>th</sup> revision; NSCP, Nordic Medico-Statistical Classification of Surgical Procedures; NPU, Nomenclature, Properties and Units in Laboratory Medicine; NSAIDSnon-steroidal anti-inflammatory drugs
