# Supplementary material for: Three-year risk of cardiovascular disease among intensive care patients with acute kidney injury: a population-based cohort study
Source: PubMed Central journal article supplement (PMC4197334; doi:10.1186/s13054-014-0492-2), 2014-10-14
Supplement: 13054_2014_492_MOESM2_ESM.pdf [file 13054_2014_492_MOESM2_ESM.pdf]

## Characteristics of patients with missing plasma creatinine measurements, patients without AKI, and with AKI

|                                                                                   | Missing<br>P-creatinine<br>n = 1,846 | Without<br>AKI<br>n = 16,764 | AKI<br>stage 1<br>n = 2,666 | AKI<br>stages 2-3<br>n = 2,126 |
|-----------------------------------------------------------------------------------|--------------------------------------|------------------------------|-----------------------------|--------------------------------|
| <b>Age</b>                                                                        |                                      |                              |                             |                                |
| Age, median (IQR)                                                                 | 39 (28–56)                           | 57 (39–69)                   | 68 (58–77)                  | 67 (56–75)                     |
| <b>Gender</b>                                                                     |                                      |                              |                             |                                |
| Female                                                                            | 1,041 (56.4)                         | 7,788 (46.5)                 | 1,031 (38.7)                | 944 (44.4)                     |
| Male                                                                              | 805 (43.6)                           | 8,976 (53.5)                 | 1,635 (61.3)                | 1,182 (55.6)                   |
| <b>Comorbidity</b>                                                                |                                      |                              |                             |                                |
| Ischemic heart disease <sup>a</sup>                                               | 61 (3.3)                             | 1,863 (11.1)                 | 513 (19.2)                  | 244 (11.5)                     |
| Cerebrovascular disease <sup>b</sup>                                              | 26 (1.4)                             | 537 (3.2)                    | 124 (4.7)                   | 86 (4.0)                       |
| Diabetes                                                                          | 74 (4.0)                             | 1,490 (8.9)                  | 460 (17.3)                  | 433 (20.4)                     |
| Chronic kidney disease                                                            | 69 (3.7)                             | 1,063 (6.3)                  | 502 (18.8)                  | 338 (15.9)                     |
| Hypertension                                                                      | 131 (7.1)                            | 2,216 (13.2)                 | 664 (24.9)                  | 511 (24.0)                     |
| Peripheral vascular disease                                                       | 26 (1.4)                             | 721 (4.3)                    | 266 (10.0)                  | 202 (9.5)                      |
| Cancer                                                                            | 110 (6.0)                            | 2,282 (13.6)                 | 522 (19.6)                  | 375 (17.6)                     |
| <b>Surgical Status</b>                                                            |                                      |                              |                             |                                |
| No surgery                                                                        | 589 (31.9)                           | 6,455 (38.5)                 | 662 (24.8)                  | 793 (37.3)                     |
| Surgery                                                                           |                                      |                              |                             |                                |
| Acute cardiac surgery                                                             | 3 (0.2)                              | 195 (1.2)                    | 88 (3.3)                    | 59 (2.8)                       |
| Acute non-cardiac surgery                                                         | 867 (47.0)                           | 5,558 (33.2)                 | 834 (31.3)                  | 764 (35.9)                     |
| Elective cardiac surgery                                                          | 6 (0.3)                              | 1,701 (10.1)                 | 528 (19.8)                  | 169 (7.9)                      |
| Elective non-cardiac surgery                                                      | 381 (20.6)                           | 2,855 (17.0)                 | 554 (20.8)                  | 341 (16.0)                     |
| <b>Preadmission drug use</b>                                                      |                                      |                              |                             |                                |
| ACE inhibitors/AT2 antagonists                                                    | 154 (8.4)                            | 2,677 (16.0)                 | 763 (28.6)                  | 698 (32.8)                     |
| Beta blockers                                                                     | 165 (8.9)                            | 2,318 (13.8)                 | 667 (25.0)                  | 487 (22.9)                     |
| Calcium channel antagonists                                                       | 78 (4.2)                             | 1,587 (9.5)                  | 483 (18.1)                  | 401 (18.9)                     |
| Acetylsalicylic acid                                                              | 281 (15.2)                           | 5,286 (31.5)                 | 1,362 (51.1)                | 1,005 (47.3)                   |
| Diuretics                                                                         | 83 (4.5)                             | 1,348 (8.0)                  | 357 (13.4)                  | 272 (12.8)                     |
| Nitrates                                                                          | 17 (0.9)                             | 756 (4.5)                    | 236 (8.9)                   | 83 (3.9)                       |
| Statins                                                                           | 99 (5.4)                             | 2,533 (15.1)                 | 671 (25.2)                  | 441 (20.7)                     |
| NSAIDs                                                                            | 252 (13.6)                           | 2,486 (14.8)                 | 430 (16.1)                  | 436 (20.5)                     |
| <b>Primary diagnosis during current hospitalization</b>                           |                                      |                              |                             |                                |
| Infectious diseases                                                               | 257 (13.9)                           | 1,673 (10.0)                 | 276 (10.4)                  | 434 (20.4)                     |
| Endocrine diseases                                                                | 50 (2.7)                             | 302 (1.8)                    | 69 (2.6)                    | 99 (4.7)                       |
| Cardiovascular diseases                                                           | 140 (7.6)                            | 2,910 (17.4)                 | 873 (32.7)                  | 390 (18.3)                     |
| Respiratory diseases                                                              | 53 (2.9)                             | 741 (4.4)                    | 118 (4.4)                   | 108 (5.1)                      |
| Gastrointestinal or liver diseases                                                | 133 (7.2)                            | 1,564 (9.3)                  | 287 (10.8)                  | 303 (14.3)                     |
| Cancer or other neoplasm                                                          | 98 (5.3)                             | 2,463 (14.7)                 | 471 (17.7)                  | 304 (14.3)                     |
| Trauma or poisoning                                                               | 371 (20.1)                           | 4,198 (25.0)                 | 282 (10.6)                  | 190 (8.9)                      |
| Other                                                                             | 744 (40.3)                           | 2,913 (17.4)                 | 290 (10.9)                  | 298 (14.0)                     |
| <b>Laboratory information</b>                                                     |                                      |                              |                             |                                |
| Measured baseline creatinine                                                      | 782 (42.4)                           | 10,213 (60.9)                | 2143 (80.4)                 | 1,610 (75.7)                   |
| Maximum creatinine during admission <sup>d</sup> , $\mu\text{mol/L}$ , mean (IQR) | NA                                   | 74 (62–88)                   | 123 (101–149)               | 254 (180–397)                  |
| <b>ICU treatments</b>                                                             |                                      |                              |                             |                                |
| Mechanical ventilation                                                            | 52 (2.8)                             | 4,362 (26.0)                 | 1,297 (48.6)                | 1,126 (53.0)                   |
| Inotropes/vasopressors                                                            | 21(1.1)                              | 3,083 (18.4)                 | 1,158 (43.4)                | 1,155 (52.9)                   |
| <b>Length of admission</b>                                                        |                                      |                              |                             |                                |
| In-hospital days, <sup>e</sup> median (IQR)                                       | 2 (1–4)                              | 8 (3–15)                     | 15 (10–28)                  | 23 (12–45)                     |

Values are expressed as number (percentage) unless otherwise indicated.

<sup>a</sup> Patients with a previous diagnosis of myocardial infarction were not included in the study.

<sup>b</sup> Patients with a previous diagnosis of stroke were not included in the study.

ACE, angiotensin converting enzyme; AKI, acute kidney injury; AT2, angiotensin 2; CI, confidence interval; ICU, intensive care unit; IQR, inter-quartile range; NA, not available; NSAIDs, non-steroidal anti-inflammatory drugs
