# Supplementary material for: Three-year risk of cardiovascular disease among intensive care patients with acute kidney injury: a population-based cohort study
Source: PubMed Central journal article supplement (PMC4197334; doi:10.1186/s13054-014-0492-2), 2014-10-14
Supplement: 13054_2014_492_MOESM3_ESM.pdf [file 13054_2014_492_MOESM3_ESM.pdf]

**Adjusted HR of cardiovascular diseases after multiple imputation of AKI stages in patients without measured plasma creatinine from ICU admission to hospital discharge<sup>a</sup>**

|               | <b>AKI stage 1</b>          | <b>AKI stages 2–3</b>       |
|---------------|-----------------------------|-----------------------------|
|               | <b>Adjusted HR (95% CI)</b> | <b>Adjusted HR (95% CI)</b> |
| Heart failure | 1.31 (1.00–1.64)            | 1.44 (1.13–1.82)            |
| MI            | 1.08 (0.74–1.57)            | 1.56 (1.08–2.24)            |
| Stroke        | 1.12 (0.71–1.68)            | 1.09 (0.71–1.68)            |

<sup>a</sup> Compared with patients without AKI.

AKI, acute kidney injury; CI, confidence interval; HR, hazard ratio; ICU, intensive care unit; MI, myocardial infarction.
